# Supplementary material for: Fusobacterium nucleatum Promotes Metastasis in Colorectal Cancer by Activating Autophagy Signaling via the Upregulation of CARD3 Expression
Source: PubMed Central journal article supplement (PMC6929621; doi:10.7150/thno.38870), 2020-01-01
Supplement: thnov10p0323s1.pdf [file thnov10p0323s1.pdf]

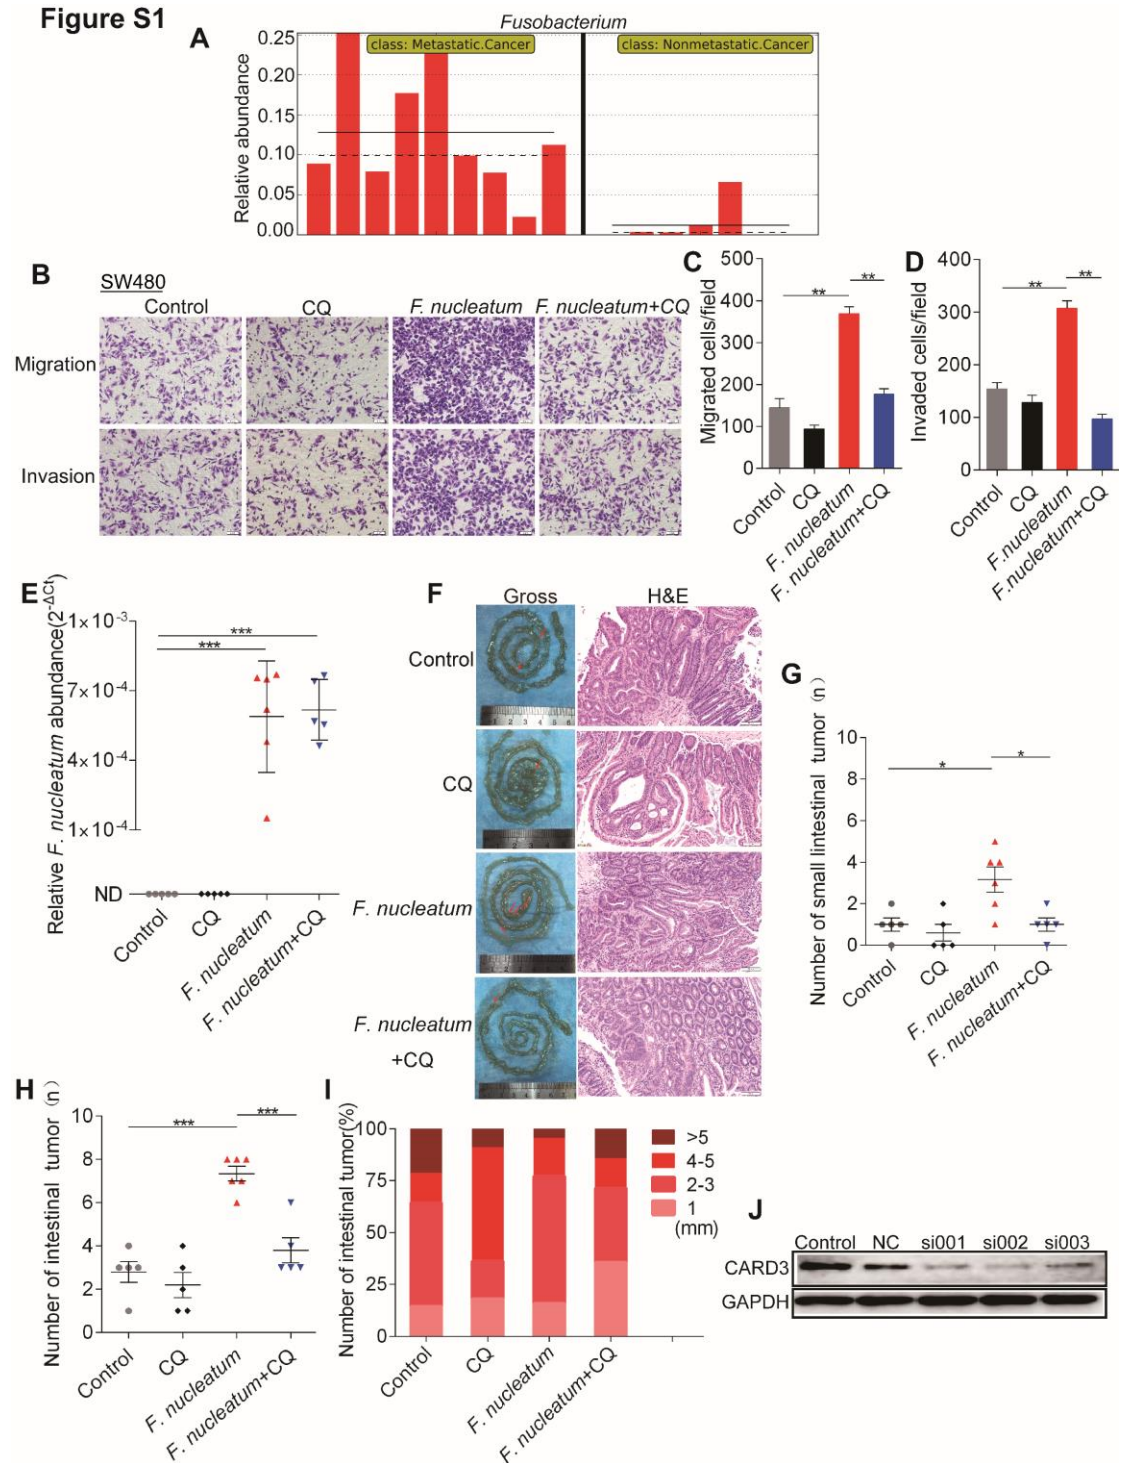

**Figure S1. *F. nucleatum* Induces Cancer Metastasis via the Autophagy Pathway**

(A) 16S rDNA analysis of the relative abundance of *Fusobacterium* in CRC tissues from patients without metastasis (n = 7) and with metastasis

(n = 9).

(B-D) Transwell assays were conducted to examine the migratory and invasive abilities of SW480 cells cocultured with *F. nucleatum* (F01), CQ or PBS control. The indicated migrated and invaded cells were quantified in five randomly selected fields, and the data are presented as the means  $\pm$  SDs (\*\* $P < 0.01$ ; unpaired Student's *t*-test).

(E) Relative fusobacterial gDNA abundance ( $2^{-\Delta C_t}$ ) in tumor tissues from APC<sup>Min/+</sup> mice with *F. nucleatum* (F01), CQ or PBS. (n = 5-6 mice/group; the error bars indicate the means  $\pm$  SDs; \*\*\* $P < 0.001$ , Mann-Whitney U test).

(F-I) Representative data for small intestinal tumors (red arrows) and HE staining of tumor tissues from the indicated groups of APC<sup>Min/+</sup> mice (F). Statistical analysis of the small intestinal tumor numbers (G), whole intestinal tumor numbers (H) and tumor sizes (I) in different groups of mice (n = 5-6 mice/group; \* $P < 0.05$ , and \*\*\* $P < 0.001$ ; nonparametric Mann-Whitney test).

(J) Western blot analysis was performed with HCT116 cells transfected with non-targeting (NC) or CARD3-targeting (si001, si002, si003) siRNA.

**Supplementary Table 1**

| Primers             |         | Sequence 5'-3'                            | Purpose |
|---------------------|---------|-------------------------------------------|---------|
| <i>F. nucleatum</i> | Forward | 5'- CAACCATTACTTTAACTCTACCATGTTCA -3'     | qPCR    |
|                     | Reverse | 5'- GTTGACTTTACAGAAGGAGATTATGTAAAAATC -3' |         |
| PGT                 | Forward | 5'- ATCCCCAAAGCACCTGGTTT -3'              | qPCR    |
|                     | Reverse | 5'- AGAGGCCAAGATAGTCCTGGTAA -3'           |         |
| H-GAPDH             | Forward | 5'- CATCATCCCTGCCTCTACTGG -3'             | qPCR    |
|                     | Reverse | 5'- GTGGGTGTCGCTGTTGAAGTC -3'             |         |
| H-E-cadherin        | Forward | 5'- TTCTTCGGAGGAGAGCGG -3'                | qPCR    |
|                     | Reverse | 5'- CAATTCATCGGGATTGGC -3'                |         |
| H-CARD3             | Forward | 5'- GCTGCATTCTGTGATCACAAGAC -3'           | qPCR    |
|                     | Reverse | 5'- GACAGAAGGGCATCTAGCGAC -3'             |         |
| H-Vimentin          | Forward | 5'- AGGCAAAGCAGGAGTCCACT -3'              | qPCR    |
|                     | Reverse | 5'- CGTTCCAGGGACTCATTGGT -3'              |         |
| H-ATG5              | Forward | 5'- TGTTTATTCGTCGGTTCATTTTG -3'           | qPCR    |
|                     | Reverse | 5'- CAGCTTAGTGTTCCCTGCATTC -3'            |         |
| H-ATG12             | Forward | 5'- CTAATTCAATTGCTGCTGGAGG -3'            | qPCR    |
|                     | Reverse | 5'- GCCAGCAGGTTCCCTCTGTTC -3'             |         |
| H-ATG16L1           | Forward | 5'- GCTAAGTTCCTGCTGGACAATG -3'            | qPCR    |
|                     | Reverse | 5'- GGCAGTAATCTTTCCCAACAGC -3'            |         |
| H-ATG7              | Forward | 5'- TTCCTCCTCTTGACATTTGCAG -3'            | qPCR    |
|                     | Reverse | 5'- TATCTTCGTCCTTTGACCTTGG -3'            |         |
| H-beclin1           | Forward | 5'- GGCACAATCAATAACTTCAGGC -3'            | qPCR    |

---

Reverse

5'-GGCAGCTCCTTAGATTTGTCTG-3'

---
